# Supplementary material for: Knockdown of Circular RNA hsa_circ_PVT1 Inhibited Laryngeal Cancer Progression via Preventing wnt4/β-Catenin Signaling Pathway Activation
Source: Frontiers journal article supplement (doi:10.3389/fcell.2021.658115), 2021-07-16
Supplement: Table_1.DOCX [file Table_1.DOCX]

Table 1-Clinical Features of LC Patients

| Features | (N) | Percentage |
| --- | --- | --- |
| Age(year) |  |  |
| <50 | 18 | 60% |
| >50 | 12 | 40% |
| Sex |  |  |
| Male | 22 | 73.3% |
| Female | 8 | 26.7% |
| Lymph Node Metastasis |  |  |
| Yes | 17 | 56.7% |
| TNM Stage Group |  |  |
| <lll | 20 | 66.7% |
| ≥lll | 10 | 33.3% |
| Histology |  |  |
| Squamous | 27 | 90% |
| Adenocarcinoma | 3 | 10% |
| Histological grade |  |  |
| Wel/moderate | 25 | 83.3% |
| Poor | 5 | 16.7% |
