# Supplementary material for: Knockdown of Circular RNA hsa_circ_PVT1 Inhibited Laryngeal Cancer Progression via Preventing wnt4/β-Catenin Signaling Pathway Activation
Source: Frontiers journal article supplement (doi:10.3389/fcell.2021.658115), 2021-07-16
Supplement: Table_2.DOCX [file Table_2.DOCX]

Table 2. Top ten circRNAs that show differential expression in LC compared with paired normal tissues in patients.

| circRNAs | Fold-change | P-value | Host gene |
| --- | --- | --- | --- |
| Has_circRNA_0009143 | 11.1 | 0.02112 | PVT1 |
| Has_circRNA_0000008 | 9.2 | 0.03432 | GNB1 |
| Has_circRNA_0001412 | 8.72 | 0.04728 | FIP1L1 |
| Has_circRNA_0001496 | 7.53 | 0.01298 | CCDC125 |
| Has_ circRNA_ 102049 | 5.67 | 0.03789 | TADA2A |
| Has_ circRNA_ 104075 | -4.9 | 0.00765 | NUP153 |
| Has_ circRNA_ 102922 | -4.3 | 0.02872 | SGPP2 |
| Has_circRNA_0078090 | -3.9 | 0.00182 | GRP126 |
| Has_circRNA_0091964 | -3.2 | 0.01273 | FLNA |
| Has_circRNA_0085473 | -3.0 | 0.00023 | ATAD2 |
